# Supplementary material for: Transition-state stabilization in Escherichia coli ribonuclease P RNA-mediated cleavage of model substrates
Source: PubMed Central journal article supplement (PMC3874170; doi:10.1093/nar/gkt853), 2013-10-03

## Supplementary information

### *Chase experiment*

The cleavage reaction was performed in 20  $\mu$ l at 37 °C in buffer C (50 mM MES, pH 6.1, 0.8 M NH<sub>4</sub>OAc) supplemented with 800 mM Mg(OAc)<sub>2</sub>. The concentration of *Eco* RPR was 3.2  $\mu$ M while the substrate concentration was 0.02  $\mu$ M. The *Eco* RPR and substrate were preincubated as outlined in Materials and Methods and 10 sec after initiation of the reaction 10  $\mu$ l of the reaction mix was transferred to 2 ml of dilution buffer (50 mM MES, pH 6.1 at 37°C, 0.8 M NH<sub>4</sub>OAc and 800 mM Mg(OAc)<sub>2</sub>). At each time point, 200  $\mu$ l aliquots were removed and mixed with 700  $\mu$ l of 99.5% EtOH, then 20  $\mu$ l of 3 M NaOAc, pH 5.1 and 2  $\mu$ l of glycogen (stock concentration 20 mg/ml). As a control an identical experiment without chase was run in parallel and terminated at indicated times. The samples were stored at -20 °C overnight. The ethanol precipitated samples were collected by centrifugation for 40 min at 16000g in a microcentrifuge (Eppendorf) at 4°C. Each sample was dried and dissolved in 10  $\mu$ l of water and 20  $\mu$ l of stop solution (8.4 M Urea, 1.2 mM EDTA, 0.036% bromophenol blue, 0.036% xylene cinal) and subjected to gel-electrophoresis on 22% denaturing polyacrylamide gels (10 mM Tris-borate, pH 7.5, 1 mM EDTA and 7 M Urea) to separate the cleavage products. The products were visualized using a PhosphorImager (Molecular Dynamics 400) and quantification was done using the ImageQuant software. For further details, see Stage-Zimmermann and Uhlenbeck (28), Sinapah *et al.* (24), and Chen *et al.* (29) in the reference list in the main text).

### *Structural probing of Eco RPR<sub>wt</sub> and Eco RPR<sub>G248</sub>*

Lead(II)-induced cleavage and limited RNase T1 digestion under native conditions were conducted with *Eco* RPR<sub>wt</sub> and *Eco* RPR<sub>G248</sub> that had been 3'-end labeled with [<sup>32</sup>P]pCp essentially as described elsewhere (see below, Refs 1-3). Briefly, approximately 2 pmols of

labeled RPR in 10  $\mu$ l was pre-incubated for 10 min at 37°C in 50 mM Tris-HCl (pH 7.5), 100 mM NH<sub>4</sub>Cl and 10 mM MgCl<sub>2</sub>. The mixture also contained 4  $\mu$ M tRNA (no label). Cleavage was initiated by the addition of freshly prepared Pb(OAc)<sub>2</sub> to a final concentration of 2.5 mM and the reaction was stopped after 10 min. In the case of digestion with RNase T1, the RPR was pre-incubated as described above. One unit RNase T1 was added and the reaction mixture was incubated on ice for 10 min. The reactions were stopped after 10 min and the products were analyzed on an 8% denaturing polyacrylamide gel.

### Supplementary References

1. Kufel, J. and Kirsebom, L.A. (1996) Residues in *Escherichia coli* RNase P RNA important for cleavage site selection and divalent metal ion binding. *J. Mol. Biol.*, **263**, 685-698.
2. Kufel, J. and Kirsebom, L.A. (1998) The P15-loop of *Escherichia coli* RNase P RNA is an autonomous divalent metal ion binding domain. *RNA*, **4**, 777-788.
3. Brännvall, M., Mikkelsen, N.E. and Kirsebom, L.A. (2001) Monitoring the structure of *Escherichia coli* RNase P RNA in the presence of various divalent metal ions. *Nucleic Acids Res.*, **29**, 1426-1432.

### Supplementary figure legends

#### Figure S1

Result from a dilution experiment to assess if  $k_{-1} \gg k_{\text{obs}}$  during *Eco* RPR-mediated cleavage of pMini3bpUG

Under single-turn over conditions, the absence of rate increase of cleavage post-dilution suggests that the dissociation rate constant  $k_{-1} \gg k_{\text{obs}}$  (the rate constant of cleavage, Scheme 1 in the text). Hence,  $K^{\text{sto}} \approx K_d$  and  $K_d$  corresponds to the binding constant. The experiment was performed as described in Supplementary information. The filled squares represent the control experiment without chase while the filled circles represent the result after dilution (chase).

**Figure S2**

Fraction of cleavage at -1 of selected pMini3bp variants with modified residues at -1 by *Eco* RPR<sub>wt</sub> and *Eco* RPR<sub>G248</sub> at different divalent Mg<sup>2+</sup> concentrations.

The reactions were performed at 37°C in buffer C containing indicated concentrations of Mg<sup>2+</sup>. The concentration of *Eco* RPR<sub>wt</sub> and *Eco* RPR<sub>G248</sub>, and substrate were as described in Materials and Methods.

The data represent mean and experimental errors calculated from at least three independent experiment.

**Figure S3**

Structural probing of *Eco* RPR<sub>wt</sub> and *Eco*<sub>G248</sub>

A. Lead(II)-induced hydrolysis and RNase T1 digestion of *Eco* RPR<sub>wt</sub> and *Eco*<sub>G248</sub>. The Roman numerals mark the lead(II)-induced cleavage sites (see also Supplementary Ref 3). The reactions were conducted as outlined in Supplementary information. Lanes 1 and 4, incubation of RPRs without the addition of Pb<sup>2+</sup> or RNase T1; lanes 2 and 5, incubation of RPRs in the presence of Pb(OAc)<sub>2</sub> and lanes 3 and 6, partial digestion of the RPRs with RNase T1. The asterisk marks a band that appears when *Eco* RPR<sub>G248</sub> was subjected to digestion with RNase T1.

B. Secondary structure of *Eco* RPR<sub>wt</sub> according to Massire *et al.* (Ref 54 in the main text). The black arrowheads mark the lead(II)-induced cleavage sites (Ia to V). Residue A<sub>248</sub> that was changed to G is indicated in grey.

Figure S1

Illustration of a typical result from a dilution experiment to assess if  $k_{-1} \gg k_2$  (see Scheme 1 in the main text) during *Eco* RPR<sub>wt</sub>-mediated cleavage of pMini3bpUG.

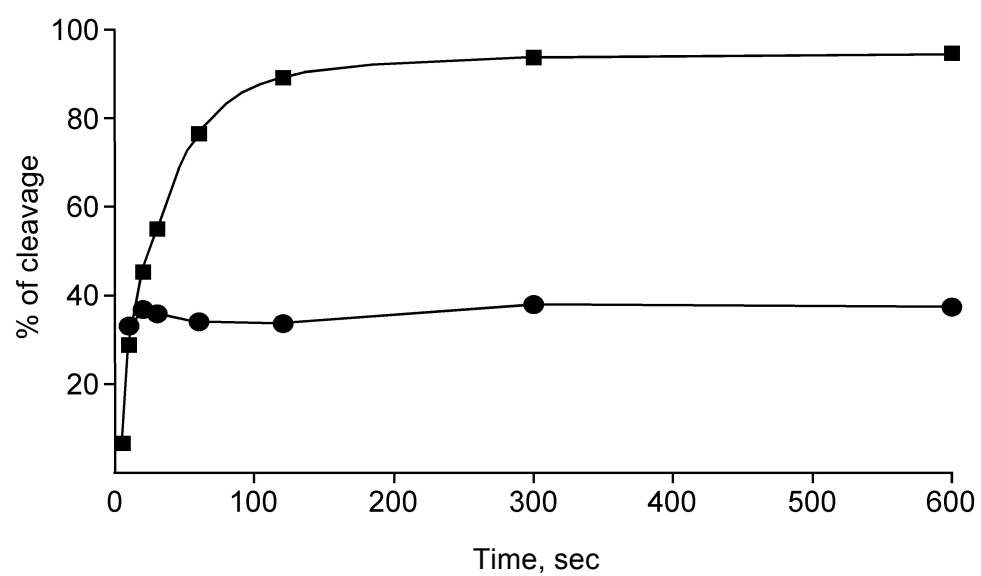

Figure S2

A. Fraction of cleavage of pMini3bpAbasicG at -1 with *Eco* RPR<sub>wt</sub> at different Mg<sup>2+</sup>.

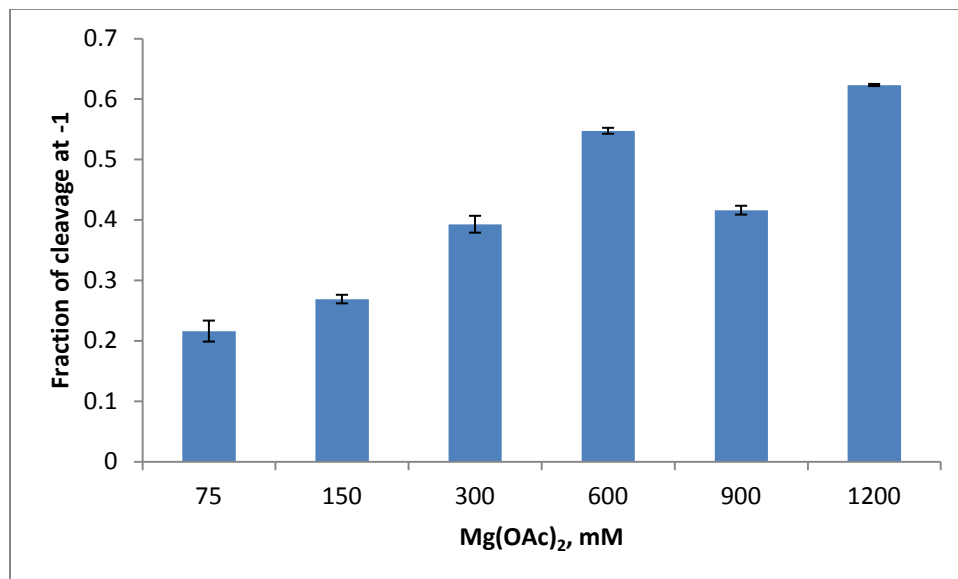

B. Fraction of cleavage of pMini3bpGG at -1 with *Eco* RPR<sub>wt</sub> at different Mg<sup>2+</sup>.

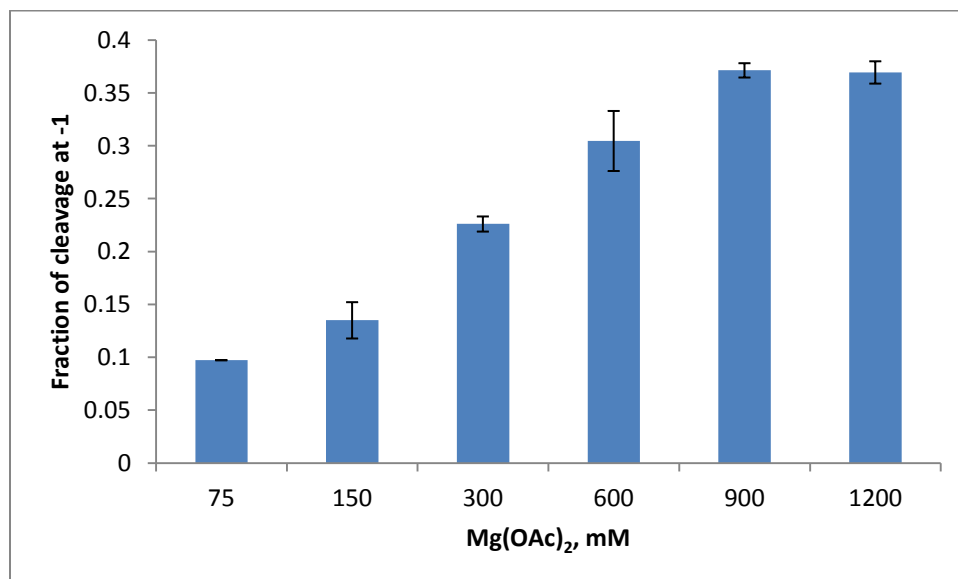

C. Fraction of cleavage of pMini3bp2APG at -1 with *Eco* RPR<sub>wt</sub> at different Mg<sup>2+</sup>.

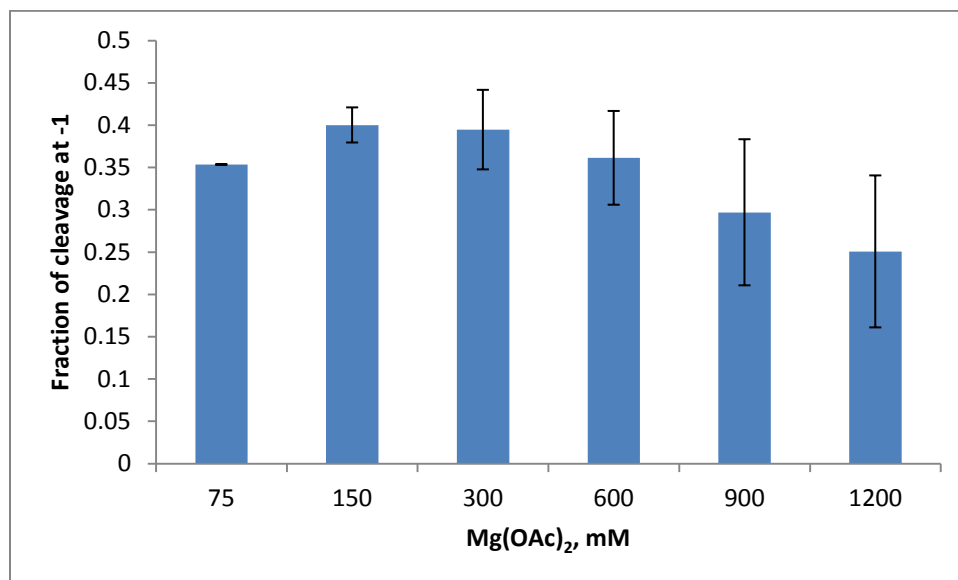

D. Fraction of cleavage of pMini3bpDAPG at -1 with *Eco* RPR<sub>wt</sub> at different Mg<sup>2+</sup>.

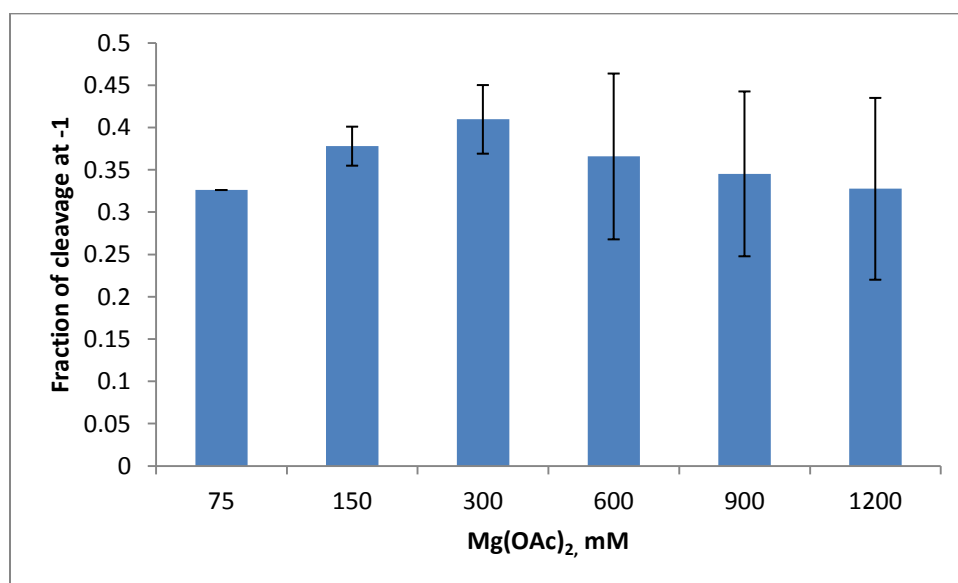

E. Fraction of cleavage of pMini3bpIsoCG at -1 with *Eco* RPR<sub>G248</sub> at different Mg<sup>2+</sup>.

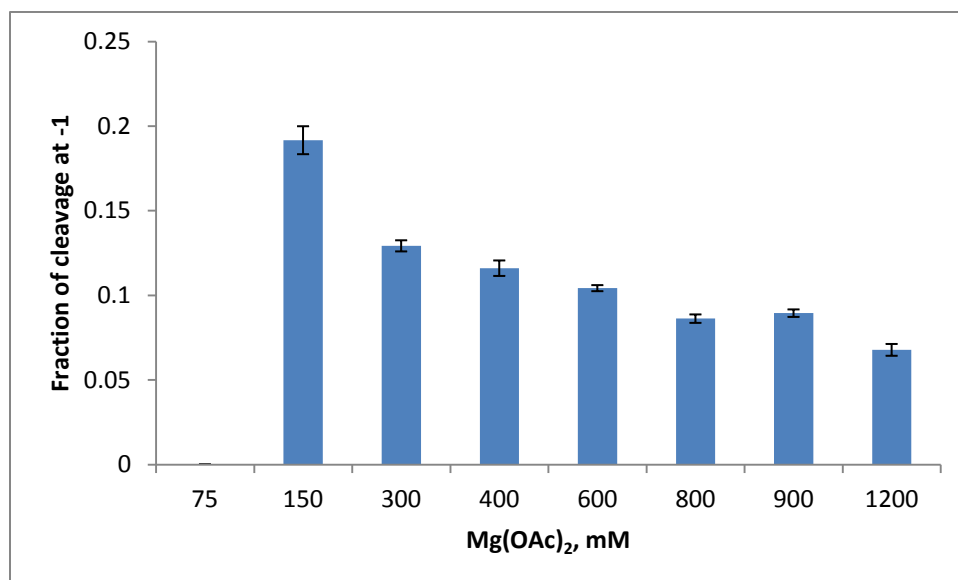

Figure S3

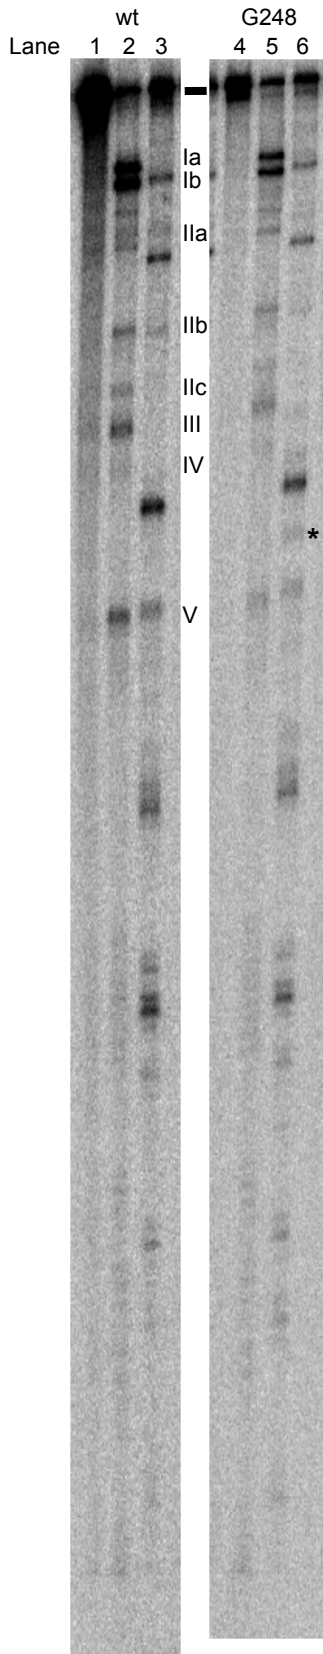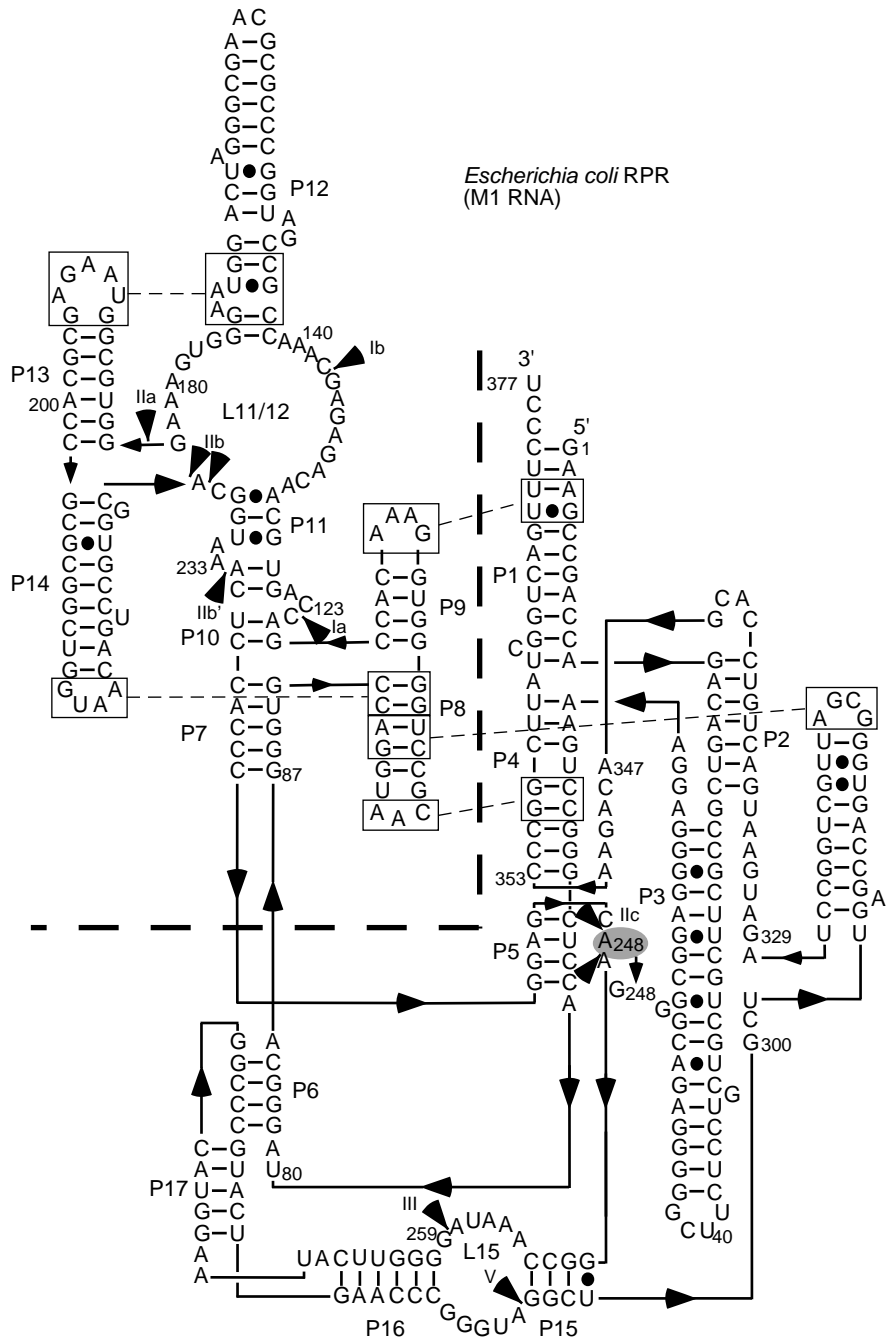

Supplement: supp_gkt853_nar-01130-h-2013-File007.pdf [file supp_gkt853_nar-01130-h-2013-File007.pdf]
